# Supplementary material for: A collaborative diffusion mechanism of multiple atoms during Cu–Ag bimetal surface reconstruction
Source: Royal Society of Chemistry journal article supplement (doi:10.1039/d2cp05591k), 2023-01-01
Supplement: d2cp05591k1.pdf [file d2cp05591k1.pdf]

# **A collaborative diffusion mechanism of multiple atoms during Cu-Ag bimetal surface reconstruction**

Xue Yan<sup>a</sup>, Xiangxiang Wang<sup>a</sup>, Jingli Han<sup>d</sup>, Xiangjian Du<sup>c</sup>, Zhongyi Liu<sup>b</sup>, Yongpeng Yang<sup>a,b\*</sup>

<sup>a</sup>Henan Institute of Advanced Technology, Zhengzhou University, Zhengzhou 450003, China

<sup>b</sup>Green Catalysis Center, College of Chemistry, Zhengzhou University, Zhengzhou 450001, China

<sup>c</sup>College of Materials Science and Engineering, Zhengzhou University, Zhengzhou 450052, China

<sup>d</sup>Henan Engineering Research Center of Catalysis and Separation of Cyclohexanol, School of Material and Chemical Engineering, Zhengzhou University of Light Industry, Zhengzhou 450001, China

Corresponding author E-mail: [ypyang2017@zzu.edu.cn](mailto:ypyang2017@zzu.edu.cn) (Yongpeng Yang)

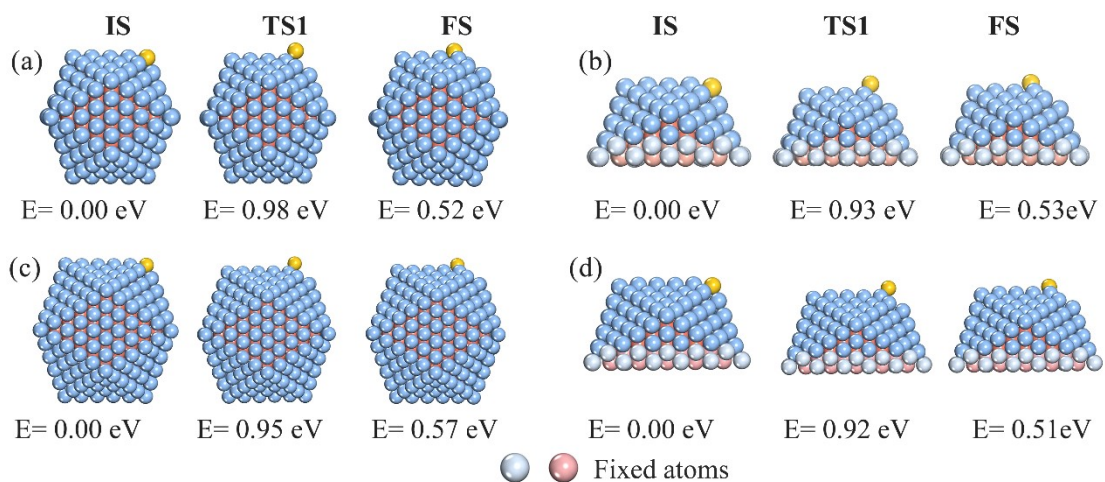

**Fig. S1** The configuration and relative energy of direct outward diffusion of vertex atom. (a-b)  $\text{Cu}_{147}@\text{Ag}_{162}$ . (c-d)  $\text{Cu}_{309}@\text{Ag}_{252}$ .

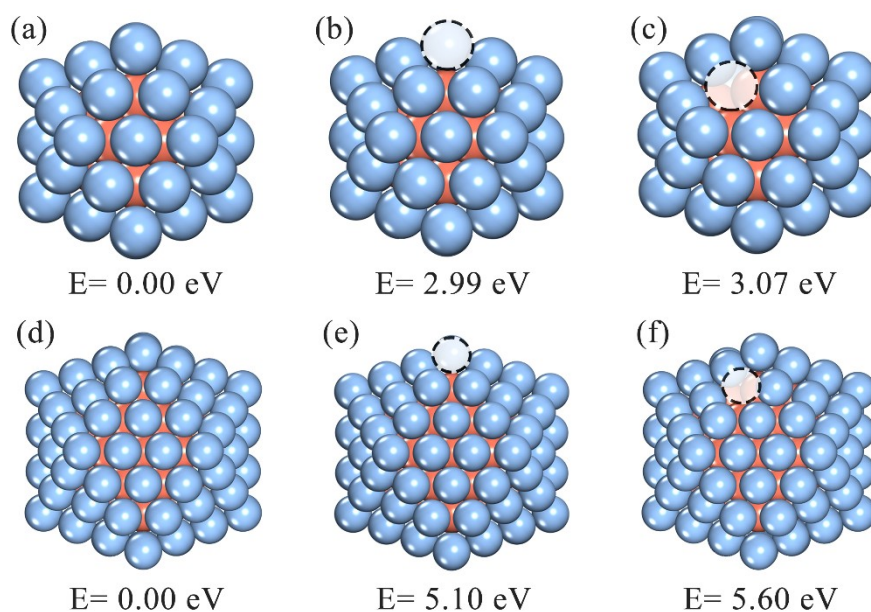

**Fig. S2** The energy of (a)  $\text{Cu}_{13}@\text{Ag}_{42}$ , and  $\text{Cu}_{13}@\text{Ag}_{41}$  with vacancy in (b) vertex site and (c) edge site. The energy of (d)  $\text{Cu}_{55}@\text{Ag}_{92}$ , and  $\text{Cu}_{55}@\text{Ag}_{91}$  with vacancy in (e) vertex site and (f) edge site.

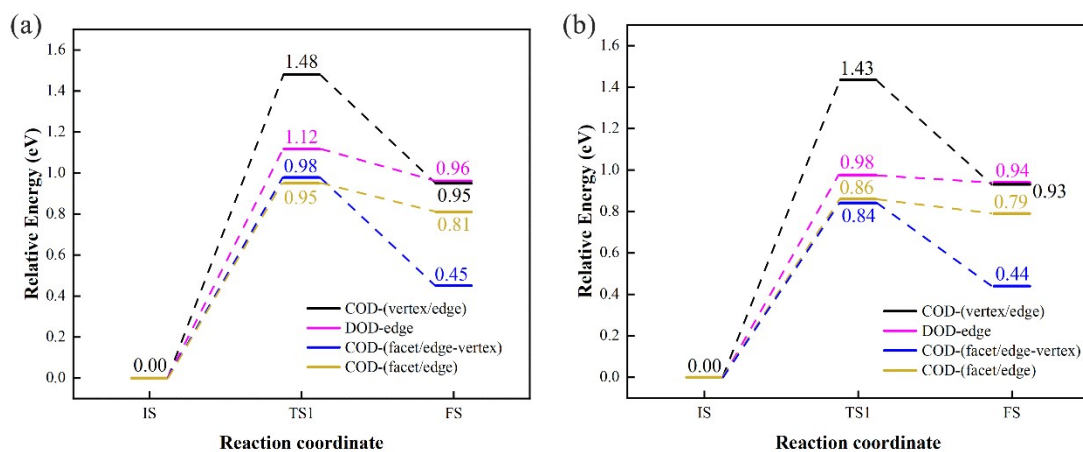

**Fig. S3** Relative energy of surface diffusion of (a) Cu<sub>147</sub>@Ag<sub>162</sub> and (b) Cu<sub>309</sub>@Ag<sub>252</sub>, direct outer diffusion (DOD) and collaborative outer diffusion (COD).

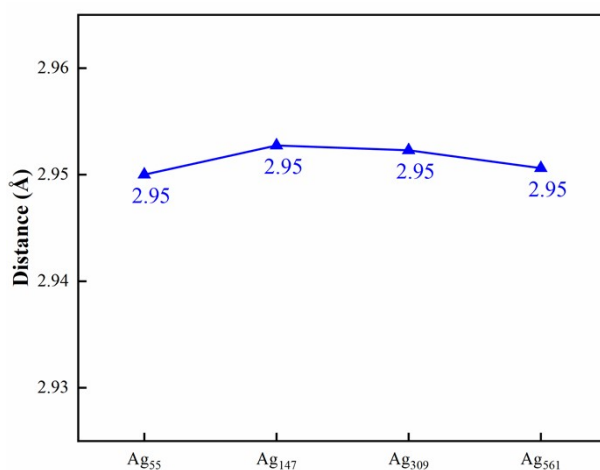

**Fig. S4** The average surface Ag-Ag bond lengths for pure Ag NPs.

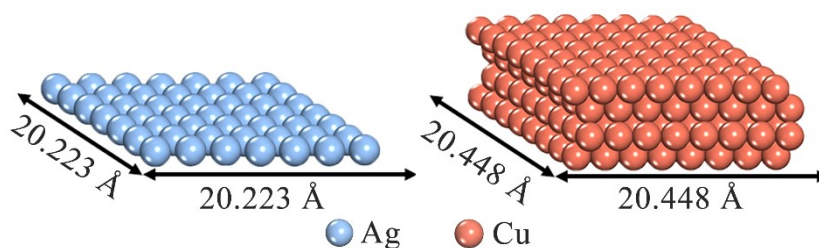

**Fig. S5** Lattice parameter of Ag(111) and Cu(111) surface.

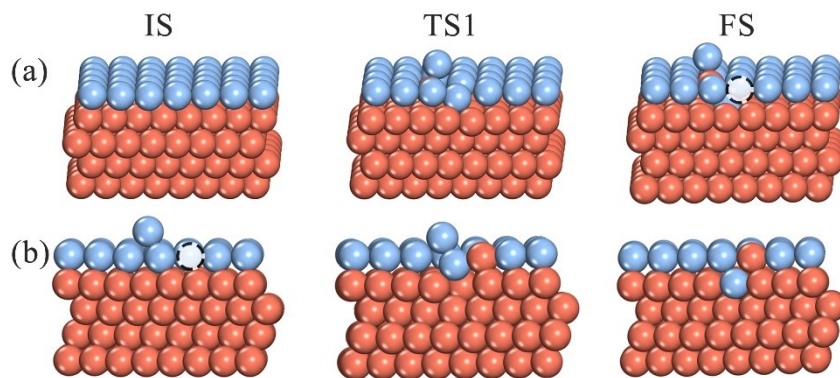

**Fig. S6** (a) Directly inward diffusion process of surface Ag atom (DID-edge). (b) Collaborative inward diffusion process of surface Ag atom (CID-edge).

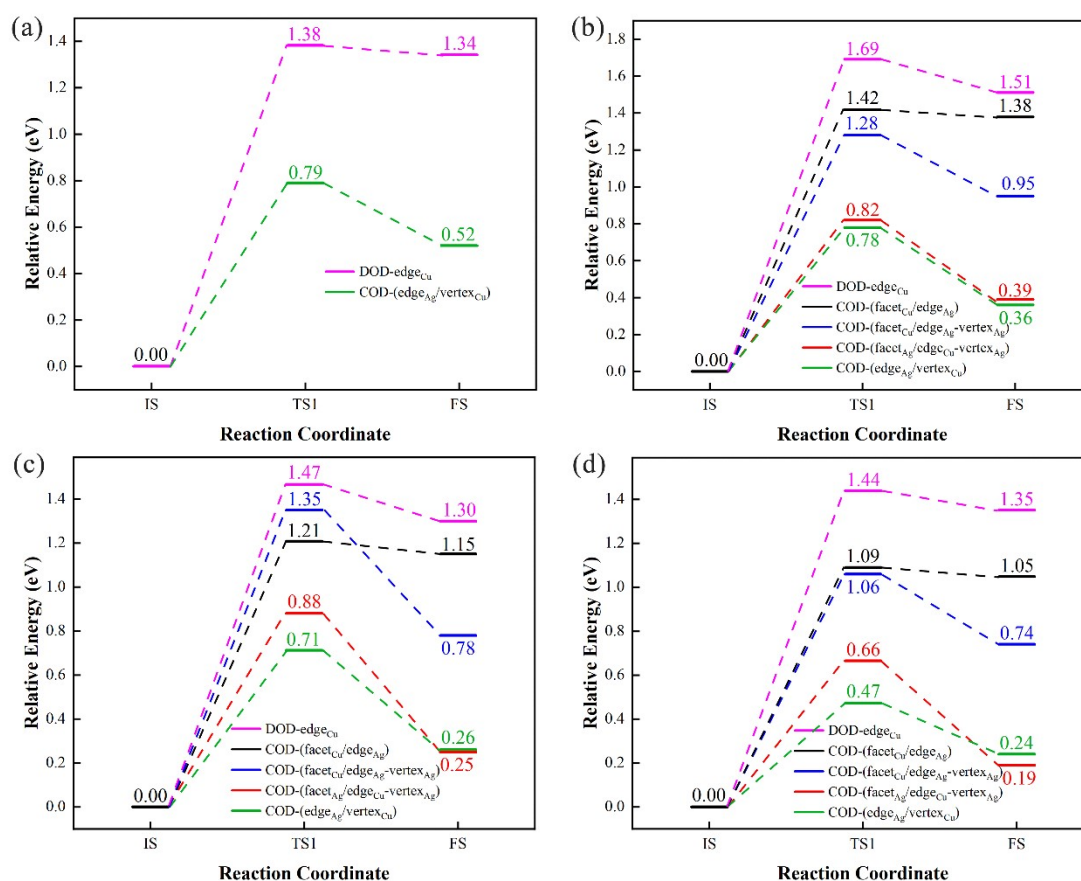

**Fig. S7** Relative energy of outward diffusion of Cu@AgCu<sub>1</sub> NPs. (a) Cu<sub>13</sub>@Ag<sub>41</sub>Cu<sub>1</sub>. (b) Cu<sub>55</sub>@Ag<sub>91</sub>Cu<sub>1</sub>. (c) Cu<sub>147</sub>@Ag<sub>161</sub>Cu<sub>1</sub>. (d) Cu<sub>309</sub>@Ag<sub>251</sub>Cu<sub>1</sub>.

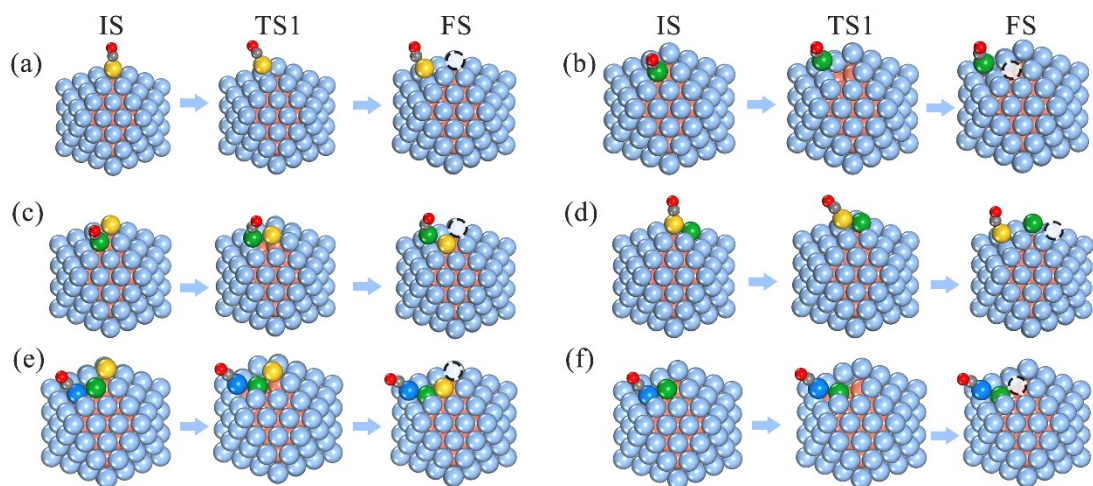

**Fig. S8** Diffusion paths of  $\text{Cu}_{55}@\text{Ag}_{92}(\text{CO})_1$ . (a) Directly outward diffusion of vertex atom, abbreviated as  $\text{DOD-vertex}_{(\text{Ag-CO})}$ . (b) Directly outward diffusion of edge atom, abbreviated as  $\text{DOD-edge}_{(\text{Ag-CO})}$ . (c) Outward diffusion of edge atom with collaborative diffusion of vertex atom, abbreviated as  $\text{COD}-(\text{edge}_{(\text{Ag-CO})}/\text{vertex})$ . (d) Outward diffusion of vertex atom with collaborative diffusion of edge atom, abbreviated as  $\text{COD}-(\text{vertex}_{(\text{Ag-CO})}/\text{edge})$ . (e) Outward diffusion of facet atom with collaborative diffusion of edge and vertex atom, abbreviated as  $\text{COD}-(\text{facet}_{(\text{Ag-CO})}/\text{edge-vertex})$ . (f) Outward diffusion of facet atom with collaborative diffusion of edge atom, abbreviated as  $\text{COD}-(\text{facet}_{(\text{Ag-CO})}/\text{edge})$ .

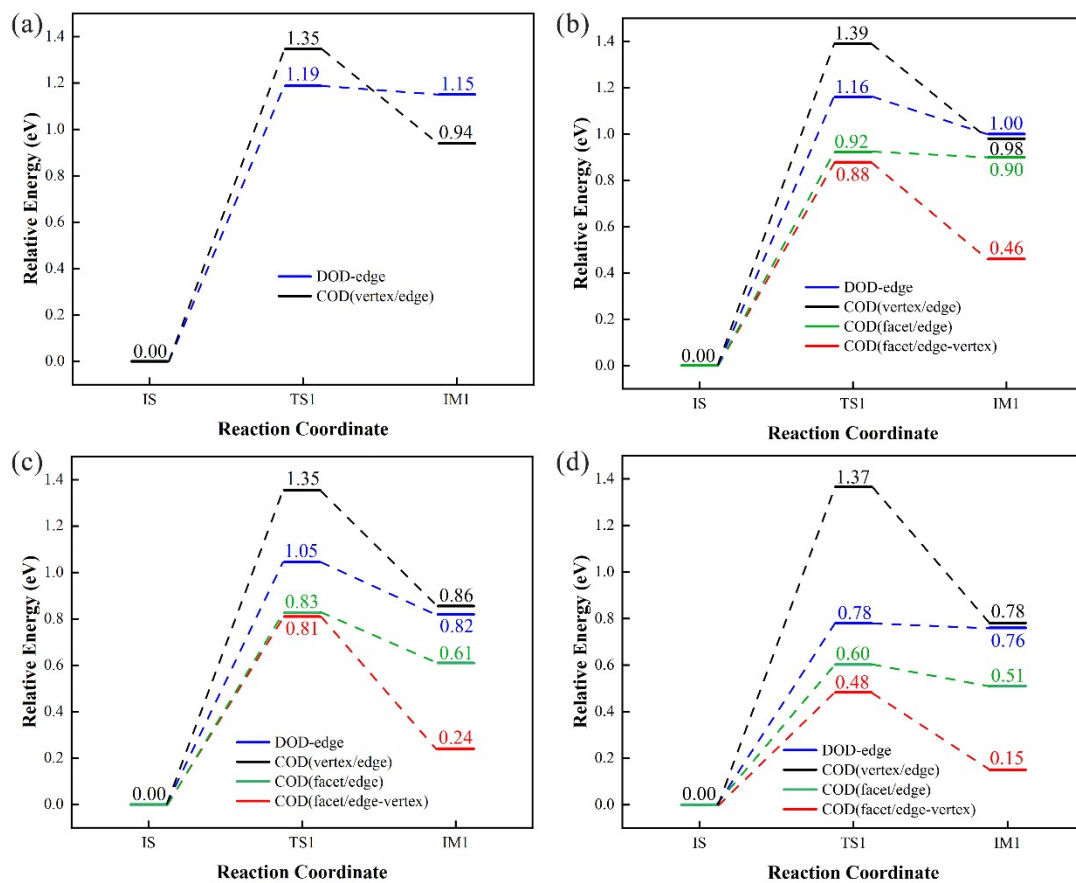

**Fig. S9** Relative energy of outward diffusion in Cu@Ag NPs after one CO adsorbed.

(a)  $\text{Cu}_{13}@Ag_{42}(\text{CO})_1$ . (b)  $\text{Cu}_{55}@Ag_{92}(\text{CO})_1$ . (c)  $\text{Cu}_{147}@Ag_{162}(\text{CO})_1$ . (d)

$\text{Cu}_{309}@Ag_{252}(\text{CO})_1$ .

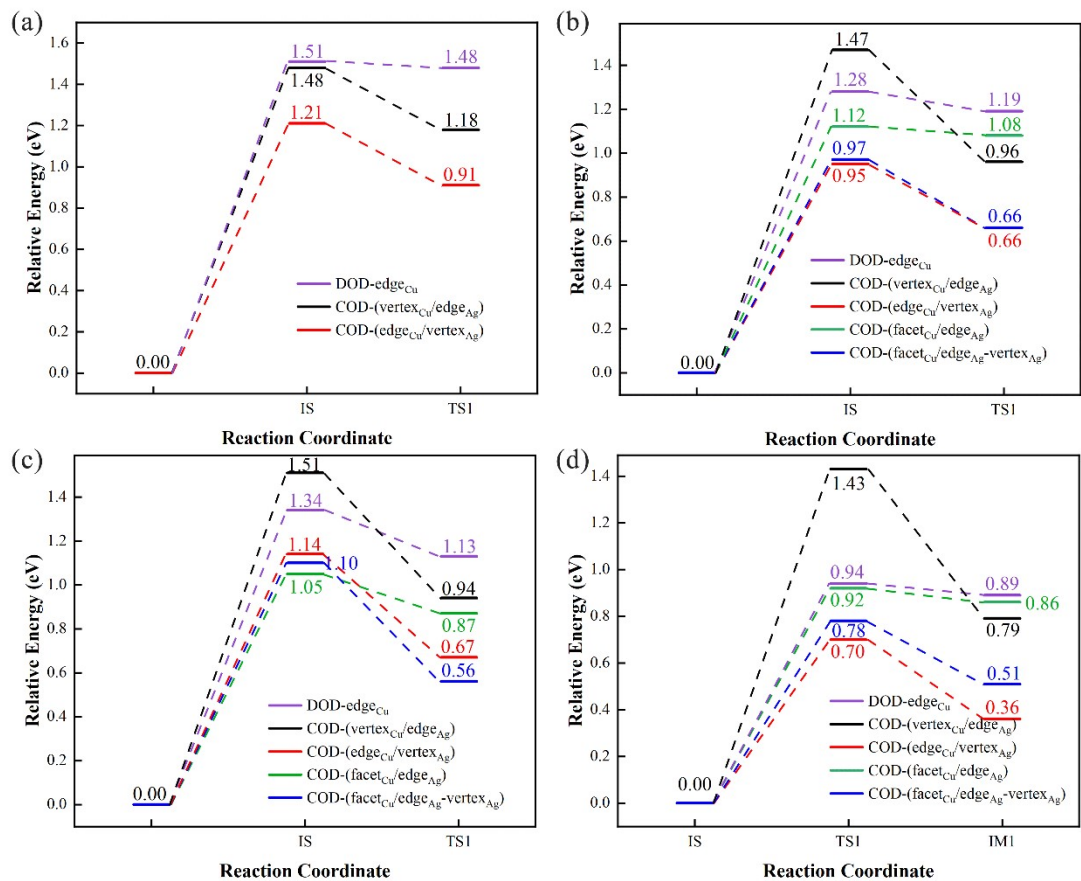

**Fig. S10** Relative energy of outer diffusion in Cu@AgCu<sub>1</sub> NPs with one CO adsorbed.

(a) Cu<sub>13</sub>@Ag<sub>41</sub>Cu<sub>1</sub>(CO)<sub>1</sub>. (b) Cu<sub>55</sub>@Ag<sub>91</sub>Cu<sub>1</sub>(CO)<sub>1</sub>. (c) Cu<sub>147</sub>@Ag<sub>161</sub>Cu<sub>1</sub>(CO)<sub>1</sub>. (d)

Cu<sub>309</sub>@Ag<sub>251</sub>Cu<sub>1</sub>(CO)<sub>1</sub>.

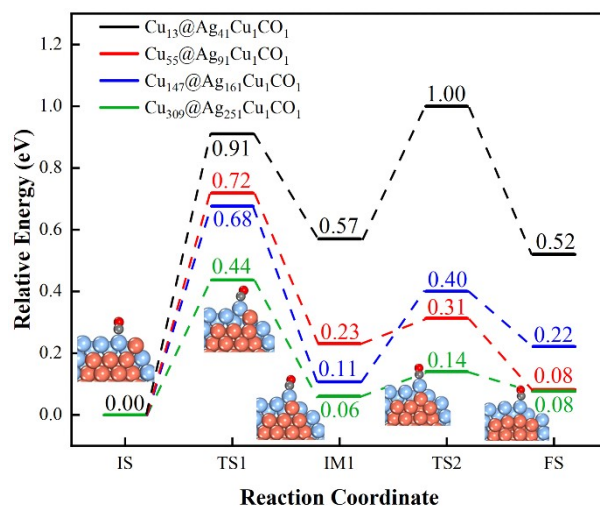

**Fig. S11** Relative energy of outer diffusion of edge Ag atom with collaborative of vertex Cu atom ( $\text{COD-edge}_{(\text{Ag-CO})}/\text{vertex}_{\text{Cu}}$ ).

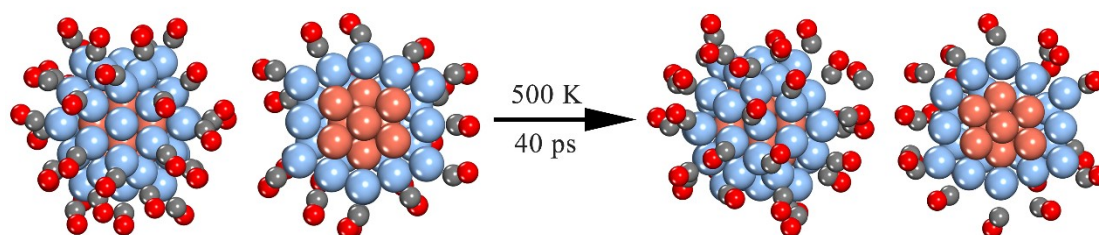

**Fig. S12** Snapshots of icosahedral  $\text{Cu}_{13}@\text{Ag}_{42}(\text{CO})_{36}$  during AIMD simulation at 500 K.



**Table S1** The adsorption energies of CO (in eV) in Cu@Ag NPs

|                                           | vertex | edge  | facet |
|-------------------------------------------|--------|-------|-------|
| Cu <sub>13</sub> @Ag <sub>42</sub> _Ico   | -1.27  | -1.33 |       |
| Cu <sub>55</sub> @Ag <sub>92</sub> _Ico   | -1.63  | -1.57 | -1.53 |
| Cu <sub>147</sub> @Ag <sub>162</sub> _Ico | -1.10  | -1.05 | -0.98 |
| Cu <sub>309</sub> @Ag <sub>252</sub> _Ico | -1.02  | -0.92 | -0.88 |

**Table S2** The segregation energies (in eV) in Cu@Ag NPs

|                                           | Without CO <sup>a</sup> |      |       | One CO <sup>b</sup> |       |       |
|-------------------------------------------|-------------------------|------|-------|---------------------|-------|-------|
|                                           | vertex                  | edge | facet | vertex              | edge  | facet |
| Cu <sub>13</sub> @Ag <sub>42</sub> _Ico   | 0.25                    | 0.25 |       | -0.25               | -0.26 |       |
| Cu <sub>55</sub> @Ag <sub>92</sub> _Ico   | 0.13                    | 0.01 | 0.01  | -0.29               | -0.43 | -0.47 |
| Cu <sub>147</sub> @Ag <sub>162</sub> _Ico | 0.17                    | 0.09 | 0.01  | -0.34               | -0.52 | -0.53 |
| Cu <sub>309</sub> @Ag <sub>252</sub> _Ico | 0.14                    | 0.04 | -0.01 | -0.37               | -0.44 | -0.59 |

<sup>a</sup>Segregation energies with one Cu atom segregating to surface. <sup>b</sup>Segregation energies with one Cu atom segregating to surface with one CO adsorbed.
